# Supplementary material
Source: HighWire-hosted journal article supplement (https://cmaj.ca/highwire/filestream/58224/field_highwire_adjunct_files/1/assoc-tonelli-2-at.pdf)
Supplement: assoc-tonelli-2-at.pdf [file assoc-tonelli-2-at.pdf]

**Appendix 2: Relative hazard of mortality among 18 722 patients receiving hemodialysis, by patient characteristic**

| Characteristic                             | Cause of death; adjusted* hazard ratio (95% CI) |                   |                       |
|--------------------------------------------|-------------------------------------------------|-------------------|-----------------------|
|                                            | All causes                                      | Infectious causes | Cardiovascular causes |
| <b>Age, yr</b>                             |                                                 |                   |                       |
| < 45                                       | 0.21 (0.19-0.23)                                | 0.40 (0.30-0.53)  | 0.26 (0.22,0.30)      |
| 45-64.9                                    | 0.43 (0.40-0.45)                                | 0.67 (0.55-0.82)  | 0.50 (0.46,0.55)      |
| 65-74.9                                    | 0.66 (0.63-0.69)                                | 0.80 (0.66-0.97)  | 0.69 (0.64,0.75)      |
| ≥ 75                                       | 1.0                                             | 1.0               | 1.0                   |
| Female                                     | 1.01 (0.98-1.05)                                | 1.17 (1.02-1.34)  | 0.92 (0.86,0.98)      |
| <b>Ethnic background</b>                   |                                                 |                   |                       |
| White                                      | 1.0                                             | 1.0               | 1.0                   |
| Aboriginal                                 | 1.00 (0.91-1.10)                                | 0.89 (0.65-1.23)  | 0.97 (0.83,1.14)      |
| Other                                      | 0.64 (0.59-0.69)                                | 0.66 (0.50-0.87)  | 0.67 (0.59,0.76)      |
| Unknown                                    | 1.06 (0.998-1.12)                               | 0.98 (0.78-1.23)  | 0.96 (0.86,1.06)      |
| <b>Cause of kidney failure</b>             |                                                 |                   |                       |
| Diabetic nephropathy                       | 1.0                                             | 1.0               | 1.0                   |
| Glomerulonephritis                         | 0.55 (0.52-0.59)                                | 0.46 (0.35-0.59)  | 0.54 (0.49,0.61)      |
| Hypertensive or ischemic renal disease     | 0.72 (0.68-0.76)                                | 0.61 (0.49-0.75)  | 0.68 (0.63,0.74)      |
| Polycystic kidney disease                  | 0.47 (0.41-0.52)                                | 0.50 (0.33-0.74)  | 0.41 (0.33,0.49)      |
| Other                                      | 0.75 (0.72-0.79)                                | 0.71 (0.59-0.86)  | 0.57 (0.52,0.62)      |
| <b>Comorbidity</b>                         |                                                 |                   |                       |
| Diabetes mellitus                          | 1.18 (1.11-1.27)                                | 1.11 (0.85-1.46)  | 1.42 (1.27,1.58)      |
| Coronary disease                           | 1.17 (1.13-1.22)                                | 1.00 (0.85-1.17)  | 1.46 (1.37,1.57)      |
| Hypertension                               | 0.81 (0.77-0.84)                                | 0.76 (0.65-0.89)  | 0.88 (0.81,0.95)      |
| Chronic heart failure                      | 1.26 (1.21-1.31)                                | 1.34 (1.14-1.56)  | 1.33 (1.24,1.42)      |
| Stroke or transient ischemic attack        | 1.18 (1.11-1.24)                                | 1.26 (1.02-1.55)  | 1.21 (1.11,1.32)      |
| Chronic lung disease                       | 1.13 (1.07-1.19)                                | 1.16 (0.94-1.44)  | 1.13 (1.03,1.23)      |
| Peripheral vascular disease                | 1.21 (1.16-1.27)                                | 1.21 (1.01-1.44)  | 1.27 (1.18,1.37)      |
| Malignant disease                          | 1.31 (1.24-1.38)                                | 1.19 (0.95-1.49)  | 0.93 (0.83,1.04)      |
| Other serious illness                      | 1.36 (1.28-1.44)                                | 1.74 (1.43-2.13)  | 1.14 (1.03,1.26)      |
| Current smoker                             | 1.23 (1.16-1.30)                                | 1.08 (0.88-1.33)  | 1.16 (1.06,1.28)      |
| In lowest quintile of socioeconomic status | 1.05 (1.00-1.09)                                | 1.09 (0.94-1.27)  | 1.04 (0.97,1.11)      |
| <b>Distance to nephrologist, km</b>        |                                                 |                   |                       |
| ≤ 50                                       | 1.0                                             | 1.0               | 1.0                   |
| 50.1-150                                   | 1.06 (1.01-1.12)                                | 1.17 (0.97-1.42)  | 0.94 (0.86,1.03)      |
| 150.1-300                                  | 1.13 (1.04-1.22)                                | 1.14 (0.86-1.52)  | 0.93 (0.81,1.07)      |
| > 300                                      | 1.13 (1.03-1.24)                                | 1.75 (1.32-2.32)  | 0.93 (0.79,1.09)      |
| Trend <i>p</i> value†                      | < 0.001                                         | < 0.001           | 0.21                  |

Note: CI = confidence interval.

\*Adjusted for all variables in the table, as well as for geographic region of residence (Atlantic, Quebec, Ontario, Manitoba, Saskatchewan, Alberta, British Columbia) and year of dialysis initiation (1990-1992, 1993-1994, 1995-1996, 1997-1998, 1999-2000).

†Linear trend for risk of death across distance categories.
